# Supplementary material
Source: ML conference proceedings conference paper supplement (https://openreview.net/forum?id=xJK53lGJP2)
Supplement: supplementary_material [file attachment]

# Supplementary Material: Exploring Masked Diffusion Transformers for Co-Speech Gesture Generation

## A Derivation of THEOREM 4.1

The proof is based on [2] and [3].

The sample  $\hat{x}_0$  predicted by the network during the sampling phase and the sample  $x_0$  from the training phase is not identical; that is,  $|\hat{x}_0 - x_0|_1$  is non-zero. This discrepancy is more apparent when the number of sampling iterations is reduced. However,  $p_\theta(x_{t-1}|x_t) = p(x_{t-1}|x_t, x_0)$  holds true when  $\hat{x}_0 = x_0$ , this requires the network to have no prediction error for  $x_0$ . In order to minimize errors during the sampling process, especially under conditions of fewer network predictions, we have conducted some derivations.

To start, we have the following definition: according to analysis-dpm [1], we model  $\hat{x}_0$  as  $\hat{x}_0 = x_0 + e_t * \epsilon_0$ ,  $\epsilon_0 \sim \mathcal{N}(0, I)$ . For  $p_\theta(x_{t-1}|x_t)$ :

$$p_\theta(x_{t-1}|x_t) = \mathcal{N}(x_{t-1}; \mu_\theta(x_t, t), \Sigma_\theta(x_t, t)) \quad (1)$$

Where  $\mu_\theta(x_t, t) = \frac{\sqrt{\alpha_{t-1}}\beta_t}{1-\alpha_t}\hat{x}_0 + \frac{\sqrt{\alpha_t}(1-\alpha_{t-1})}{1-\alpha_t}x_t$ . We consider how much error is introduced by the inconsistency between  $\hat{x}_0$  and  $x_0$ . We substitute  $\hat{x}_0 = x_0 + e_t * \epsilon_0$  into Eq. 1. Since the mean of  $\epsilon_0$  is zero, the mean of  $p_\theta(x_{t-1}|x_t)$  remains unchanged. We only consider the variance of  $p_\theta(x_{t-1}|x_t)$ :

$$\text{Var}(\hat{x}_t) = \text{Var}\left(\frac{\sqrt{\alpha_{t-1}}\beta_t}{1-\alpha_t}\hat{x}_0\right) + \Sigma_\theta(x_t, t) \quad (2)$$

$$= \text{Var}\left(\frac{\sqrt{\alpha_{t-1}}\beta_t}{1-\alpha_t}(x_0 + e_t * \epsilon_0)\right) + \Sigma(x_t, t) \quad (3)$$

$$= \text{Var}\left(\frac{\sqrt{\alpha_{t-1}}\beta_t}{1-\alpha_t}(x_0 + e_t * \epsilon_0)\right) + \Sigma(x_t, t) \quad (4)$$

$$= \left(\frac{\sqrt{\alpha_{t-1}}\beta_t}{1-\alpha_t}e_t\right)^2 + \Sigma(x_t, t) \quad (5)$$

During inference, we utilize a fixed variance, resulting in  $\Sigma_\theta(x_t, t) = \Sigma(x_t, t)$ . Table 1 shows the discrepancy between  $p_\theta(x_{t-1}|x_t)$  and  $p_\theta(x_{t-1}|x_t, x_0)$ .

**Table 1: The distribution  $p(x_{t-1}|x_t, x_0)$  during training and  $p_\theta(x_{t-1}|x_t)$  during DDPM sampling.**

|                         | Mean                 | Variance                                                                   |
|-------------------------|----------------------|----------------------------------------------------------------------------|
| $p(x_{t-1} x_t, x_0)$   | $\mu_\theta(x_t, t)$ | $(\Sigma(x_t, t))I$                                                        |
| $p_\theta(x_{t-1} x_t)$ | $\mu_\theta(x_t, t)$ | $(\Sigma(x_t, t) + (\frac{\sqrt{\alpha_{t-1}}\beta_t}{1-\alpha_t}e_t)^2)I$ |

From Table 1, it can be seen that the variance of the sampling distribution  $p_\theta(x_{t-1}|x_t)$  is always greater than the variance of the training distribution  $p(x_{t-1}|x_t, x_0)$ . [3] pointed out that this error cannot be addressed by adjusting the variance of  $p_\theta(x_{t-1}|x_t)$ , but can be mitigated by scaling the predicted noise  $\epsilon_t$  in the network, this indirectly reduces the variance of  $p_\theta(x_{t-1}|x_t)$ . However, since our MDT-A2G network predicts the original signal  $\hat{x}_0$ , assume that  $\hat{x}_0^t$  represents the original gesture predicted by the diffusion model

**Table 2: Quantitative comparison with different accelerating configurations.**

| Method    | DDIM 50 steps | Acceleration ratio | scale  | Average Time(s)↓ | FGD↓   | Diversity→ |
|-----------|---------------|--------------------|--------|------------------|--------|------------|
| MDT-A2G-B | ✓             | ×                  | ×      | 0.516 ± 0.099    | 161.81 | 137.33     |
| MDT-A2G-B | ×             | 1:20               | 1      | 1.984 ± 0.214    | 59.93  | 334.88     |
| MDT-A2G-B | ×             | 1:20               | 1.0005 | 1.984 ± 0.215    | 57.61  | 340.11     |

at step  $t$ , taking into account that  $\epsilon_t = (\hat{x}_t - \sqrt{\alpha_t}\hat{x}_0^t)/\sqrt{1-\alpha_t}$ , some transformations are needed:

$$\epsilon_t = (\hat{x}_t - \sqrt{\alpha_t}\hat{x}_0^t)/\sqrt{1-\alpha_t} \quad (6)$$

$$\hat{x}_0^{t-1} = (\hat{x}_t - \sqrt{1-\alpha_t} * \frac{\epsilon_t}{scale})/\sqrt{\alpha_t} \quad (7)$$

$$\hat{x}_0^{t-1} = (\hat{x}_t - \sqrt{1-\alpha_t} * \frac{(\hat{x}_t - \sqrt{\alpha_t}\hat{x}_0^t)/\sqrt{1-\alpha_t}}{scale})/\sqrt{\alpha_t} \quad (8)$$

Ensuring that *scale* is greater than 1 reduces the variance of  $p_\theta(x_{t-1}|x_t)$ . Based on experience, we set *scale* to 1.0005. In the acceleration phase, we scale the variance of the previous diffusion model prediction  $\hat{x}_0^t$  and use  $\hat{x}_0^t$  as the next step's prediction  $\hat{x}_0^{t-1}$ .

## B Additional Details of Ablation Studies

Figure 1 showcases the baseline mentioned in Table 6 of the section "Effectiveness of Different Feature Processing" within the 5.4 Ablation Studies. In this baseline, we have substituted the feature processing operation from DSG+ (baseline) into MAT-A2G, providing a foundation for comparison with other methods.

Figure 2 presents the AdaLN-Zero, as mentioned in Table 6 from the "Effectiveness of Different Feature Processing" section within the 5.4 Ablation Studies.

## C Compared to DDIM

As shown in Table 2, we observed that directly using DDIM [5] to accelerate the inference process of MDT-A2G does not yield satisfactory results. We still need to compute the reverse process for each step during the acceleration phase, e.g., with an acceleration ratio of 1:20. In the  $i$ -th step, we obtain  $\hat{x}_0^i$  through denoising network computation, and then use Eq. 8 to calculate the predicted value for the next 20 steps.

## D More details about feature processing

Emotion: The BEAT dataset's eight emotions are encoded as one-hot vectors and transformed by a linear layer into the emotion feature. We transform these labels into a continuous feature space through a linear layer.

We don't need to ensure consistent lengths for audio and text, only the same number of frames. Assuming a batch size of 150 and 300 frames, we have  $\hat{x}_a \in \mathbb{R}^{150 \times 300 \times 1131}$  and  $\hat{x}_{txt} \in \mathbb{R}^{150 \times 300 \times 301}$ . This allows us to concatenate  $\hat{x}_a$  and  $\hat{x}_{txt}$  along the last dimension.

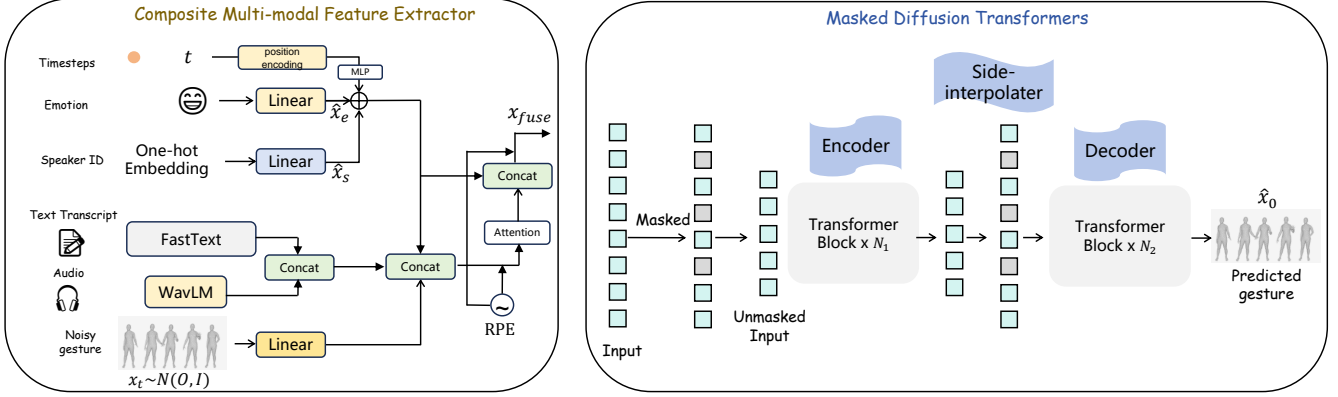

Figure 1: The baseline mentioned in Table 6 of the section "Effectiveness of Different Feature Processing" within the 5.4 Ablation Studies. RPE is Relative Position Encoding [6].

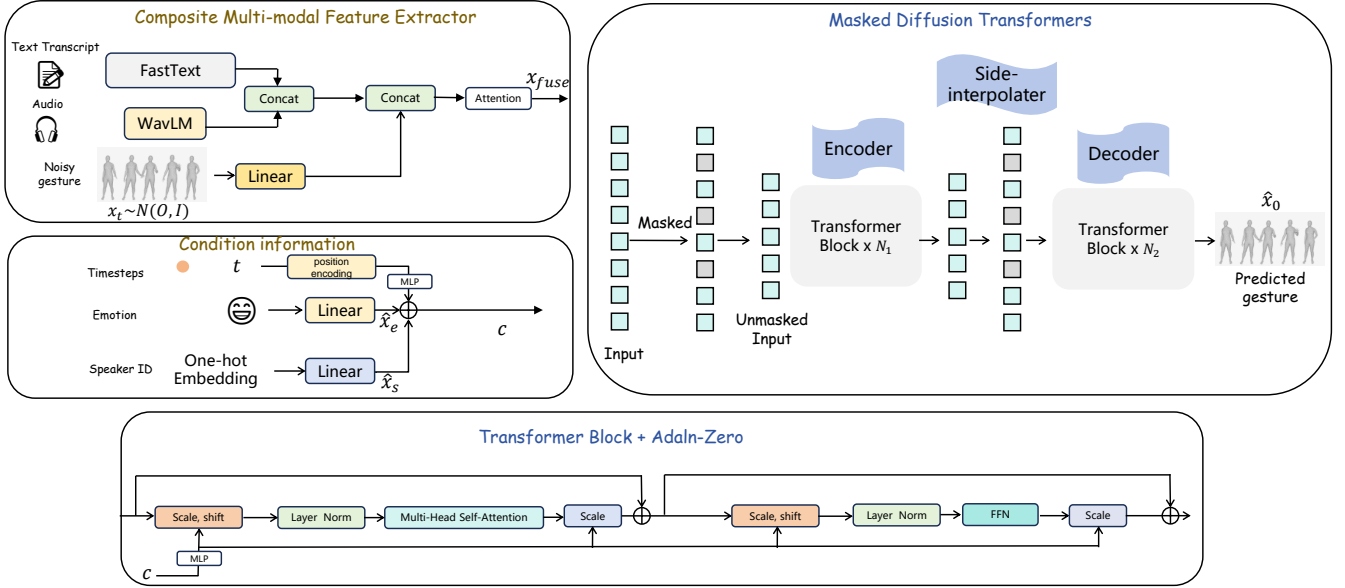

Figure 2: We have integrated the AdaLN-Zero [4] module into MDT-A2G, replacing the SEAFusion.

We generate multiple short sequences and then concatenate them, using interpolation and other post-processing techniques to ensure smooth transitions between segments.

## E Model structure

Table 3: Network configurations of MDT-A2G models.  $N_2$  is the number of decoders. The parameters and FLOs are measured during inference.

| Size                                      | Layers | $N_2$ | Dim. | Head Num. | Param. (M) | FLOs (G) |
|-------------------------------------------|--------|-------|------|-----------|------------|----------|
| Network configurations of MDT-A2G models. |        |       |      |           |            |          |
| TS                                        | 3      | 1     | 384  | 6         | 3.43       | 0.9      |
| S                                         | 5      | 2     | 384  | 6         | 5.01       | 1.4      |
| B                                         | 8      | 2     | 384  | 6         | 8.17       | 2.3      |
| L                                         | 12     | 4     | 512  | 6         | 15.4       | 4.5      |
| Network configurations of DSG+ baselines. |        |       |      |           |            |          |
| DSG+                                      | 8      | -     | 384  | 6         | 7.68       | 2.2      |

## References

- [1] Fan Bao, Chongxuan Li, Jun Zhu, and Bo Zhang. 2022. Analytic-dpm: an analytic estimate of the optimal reverse variance in diffusion probabilistic models. *arXiv*

- preprint arXiv:2201.06503* (2022).
- [2] Jonathan Ho, Ajay Jain, and Pieter Abbeel. 2020. Denoising diffusion probabilistic models. *Advances in neural information processing systems* 33 (2020), 6840–6851.
  - [3] Mang Ning, Mingxiao Li, Jianlin Su, Albert Ali Salah, and Itir Onal Ertugrul. 2023. Elucidating the exposure bias in diffusion models. *arXiv preprint arXiv:2308.15321* (2023).
  - [4] William Peebles and Saining Xie. 2023. Scalable diffusion models with transformers. In *Proceedings of the IEEE/CVF International Conference on Computer Vision*. 4195–4205.
  - [5] Jiaming Song, Chenlin Meng, and Stefano Ermon. 2020. Denoising diffusion implicit models. *arXiv preprint arXiv:2010.02502* (2020).
  - [6] Ashish Vaswani, Noam Shazeer, Niki Parmar, Jakob Uszkoreit, Llion Jones, Aidan N Gomez, Łukasz Kaiser, and Illia Polosukhin. 2017. Attention is all you need. *Advances in neural information processing systems* 30 (2017).
